# Supplementary material for: Acoustic sorting of microfluidic droplets at kHz rates using optical absorbance
Source: Royal Society of Chemistry journal article supplement (doi:10.1039/d2lc00871h), 2022-12-01
Supplement: d2lc00871h1.pdf [file d2lc00871h1.pdf]

## Supplementary Information

### Acoustic sorting of microfluidic droplets at kHz rates using optical absorbance

#### Footprint of the System

Images of the experimental setup showing the outer footprint of the system, Fig.1, and the footprint of the microchannels as a microscope image of the device, Fig. 2.

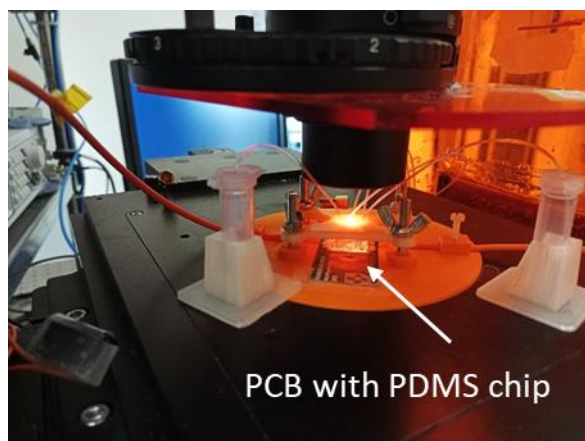

**Fig. 1** Outer footprint of the sorting setup showing the microfluidic chip in a chip holder on the microscope stage

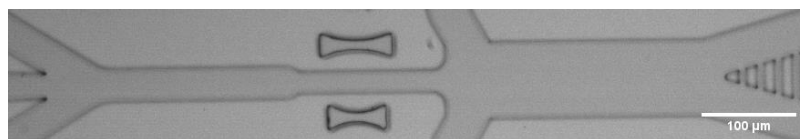

**Fig. 2** Inner footprint of the microfluidic sorting chip showing the channel structure from the spacing point to the sorting point at the bifurcation of the two outlet channels. This image corresponds with the device schematic describing the functional regions of the device in Fig. 1 of the paper. The distance from the spacing to the tip of the bifurcation is ca. 700  $\mu\text{m}$ .
